# Supplementary material for: Psychological, social and financial impacts of COVID-19 on culturally and linguistically diverse communities in Sydney, Australia
Source: PubMed Central journal article supplement — BMJ Open. 2022 May 10;12(5):e058323. doi: 10.1136/bmjopen-2021-058323 (PMC9091490; doi:10.1136/bmjopen-2021-058323), 2022-05-10
Supplement: bmjopen-2021-058323supp001.pdf [file bmjopen-2021-058323supp001.pdf]

Supplementary Table 1. Multiple regression model of factors associated with negative psychological impacts (n=707)<sup>a</sup>

| Predictor                             | Nervous/Stressed                 |                  |                                |                  | Alone/Lonely                     |                  |                                |                  |
|---------------------------------------|----------------------------------|------------------|--------------------------------|------------------|----------------------------------|------------------|--------------------------------|------------------|
|                                       | Unadjusted analysis <sup>b</sup> |                  | Adjusted analysis <sup>c</sup> |                  | Unadjusted analysis <sup>b</sup> |                  | Adjusted analysis <sup>c</sup> |                  |
|                                       | OR (95% CI)                      | P value          | OR (95% CI)                    | P value          | OR (95% CI)                      | P value          | OR (95% CI)                    | P value          |
| <b>Gender<sup>a</sup></b>             |                                  |                  |                                |                  |                                  |                  |                                |                  |
| Male                                  | Reference                        |                  | Reference                      |                  | Reference                        |                  | Reference                      |                  |
| Female                                | 1.51 (1.03 to 2.22)              | <b>0.03</b>      | 1.59 (1.03 to 2.45)            | <b>0.04</b>      | 1.05 (0.70 to 1.60)              | 0.80             | 1.01 (0.65 to 1.57)            | 0.97             |
| <b>Age group</b>                      |                                  | 0.06             |                                | 0.65             |                                  | <b>&lt;0.001</b> |                                | 0.36             |
| 18-29                                 | Reference                        |                  | Reference                      |                  | Reference                        |                  | Reference                      |                  |
| 30-49                                 | 1.07 (0.59 to 1.95)              | 0.82             | 0.76 (0.39 to 1.48)            | 0.42             | 0.84 (0.42 to 1.70)              | 0.63             | 1.54 (0.78 to 3.06)            | 0.22             |
| 50-69                                 | 1.62 (0.89 to 2.95)              | 0.12             | 0.99 (0.47 to 2.11)            | 0.99             | 1.16 (0.57 to 2.33)              | 0.68             | 1.41 (0.62 to 3.23)            | 0.42             |
| >70                                   | 2.04 (1.00 to 4.15)              | <b>0.05</b>      | 1.09 (0.41 to 2.88)            | 0.87             | 3.30 (1.53 to 7.12)              | <0.001           | 0.93 (0.35 to 2.48)            | 0.88             |
| <b>Comorbidity<sup>d</sup></b>        |                                  | <b>&lt;0.001</b> |                                | <b>0.01</b>      |                                  | <b>&lt;0.001</b> |                                | <b>&lt;0.001</b> |
| 0                                     | Reference                        |                  | Reference                      |                  | Reference                        |                  | Reference                      |                  |
| 1                                     | 0.60 (0.39 to 0.94)              | <b>0.03</b>      | 1.34 (0.77 to 2.32)            | 0.30             | 1.48 (0.90 to 2.44)              | 0.12             | 0.80 (0.45 to 1.44)            | 0.460            |
| 2+                                    | 0.44 (0.27 to 0.70)              | <b>&lt;0.001</b> | 2.39 (1.35 to 4.24)            | <0.001           | 2.74 (1.67 to 4.51)              | <b>&lt;0.001</b> | 0.34 (0.18 to 0.64)            | <b>&lt;0.001</b> |
| <b>Lowest ISRAD quintile</b>          | 1.16 (0.77 to 1.74)              | 0.47             | 1.41 (0.86 to 2.31)            | 0.17             | 0.80 (0.51 to 1.24)              | 0.32             | 1.08 (0.64 to 1.84)            | 0.77             |
| <b>University education</b>           | 0.47 (0.30 to 0.73)              | <b>&lt;0.001</b> | 1.28 (0.71 to 2.32)            | 0.41             | 0.43 (0.26 to 0.74)              | <b>&lt;0.001</b> | 1.10 (0.58 to 2.08)            | <b>&lt;0.001</b> |
| <b>Adequate health literacy</b>       | 0.62 (0.42 to 0.90)              | <b>0.01</b>      | 0.68 (0.39 to 1.19)            | 0.18             | 0.59 (0.39 to 0.9)               | <b>0.01</b>      | 1.17 (0.67 to 2.04)            | 0.57             |
| <b>English-language proficiency</b>   | 0.54 (0.37 to 0.78)              | <b>&lt;0.001</b> | 0.88 (0.50 to 1.57)            | 0.68             | 0.49 (0.33 to 0.74)              | <b>&lt;0.001</b> | 0.93 (0.51 to 1.72)            | 0.83             |
| <b>Years living in Australia</b>      |                                  | 0.12             |                                | 0.70             |                                  | 0.42             |                                | 0.870            |
| 5 years or less                       | Reference                        |                  | Reference                      |                  | Reference                        |                  | Reference                      |                  |
| 6 to 10 years                         | 1.36 (0.70 to 2.64)              | 0.36             | 1.22 (0.58 to 2.53)            | 0.60             | 1.26 (0.58 to 2.72)              | 0.56             | 0.88 (0.42 to 1.84)            | 0.73             |
| More than 10 years                    | 1.27 (0.74 to 2.18)              | 0.38             | 1.19 (0.61 to 2.34)            | 0.61             | 1.22 (0.63 to 2.37)              | 0.56             | 1 (0.51 to 1.95)               | 0.99             |
| Born in Australia                     | 0.51 (0.21 to 1.26)              | 0.14             | 0.73 (0.25 to 2.18)            | 0.58             | 0.60 (0.21 to 1.70)              | 0.34             | 1.38 (0.43 to 4.39)            | 0.59             |
| <b>Language group<sup>e</sup></b>     | -                                | <b>&lt;0.001</b> | -                              | <b>&lt;0.001</b> | -                                | <b>&lt;0.001</b> | -                              | <b>&lt;0.001</b> |
| <b>Perceived public health threat</b> | 1.15 (1.08 to 1.22)              | <b>&lt;0.001</b> | 1.08 (0.99 to 1.18)            | 0.07             | 1.12 (1.05 to 1.20)              | <b>&lt;0.001</b> | 0.93 (0.85 to 1.03)            | 0.15             |
| <b>Mean financial burden</b>          | 1.96 (1.55 to 2.48)              | <b>&lt;0.001</b> | 1.82 (1.42 to 2.33)            | <b>&lt;0.001</b> | -                                | -                | -                              | -                |

NB: All regression models also control for date of survey completion (binary variable, before/after 23 June when restrictions in Greater Sydney were imposed).

<sup>a</sup> n=1 respondent excluded from the weighted analyses presented in this table

<sup>b</sup> Unadjusted analyses do not control for co-variables; statistics represent the regression of each predictor on psychological outcomes with no other co-variables included in the model.

<sup>c</sup> Adjusted analyses control for all covariates listed in this table.

<sup>d</sup> Health conditions assessed included respiratory disease, asthma, chronic obstructive pulmonary disease, high blood pressure, cancer, heart disease, stroke, diabetes, depression and anxiety

<sup>e</sup> Individual comparisons for language group not presented as there is no specific contrast that is pragmatically relevant. Khmer was selected as the reference language group as this subsample was of adequate size (n>50) and had the highest proportion of people reporting negative psychological impacts.

Supplementary Table 2. Multiple regression model of factors associated with negative social impacts

| Predictor                             | Negative impact on relationships (n=399) <sup>a</sup> |                  |                                |                  | Negative impact on children (n=262) <sup>b</sup> |                  |                                |                  |
|---------------------------------------|-------------------------------------------------------|------------------|--------------------------------|------------------|--------------------------------------------------|------------------|--------------------------------|------------------|
|                                       | Unadjusted analysis <sup>c</sup>                      |                  | Adjusted analysis <sup>d</sup> |                  | Unadjusted analysis <sup>c</sup>                 |                  | Adjusted analysis <sup>e</sup> |                  |
|                                       | OR (95% CI)                                           | P value          | OR (95% CI)                    | P value          | B(95%CI)                                         | P value          | B (95% CI)                     | P value          |
| <b>Gender</b>                         |                                                       |                  |                                |                  |                                                  |                  |                                |                  |
| Male                                  | Reference                                             |                  | Reference                      |                  | Reference                                        |                  | Reference                      |                  |
| Female                                | 1.16 (0.65 to 2.09)                                   | 0.62             | 1.21 (0.72 to 2.03)            | 0.47             | -0.12 (-0.54 to 0.31)                            | 0.59             | -0.17 (-0.41 to 0.08)          | 0.18             |
| <b>Age group</b>                      |                                                       | 0.15             |                                | <b>0.03</b>      |                                                  | 0.13             |                                | 0.12             |
| 18-29                                 | Reference                                             |                  | Reference                      |                  | Reference                                        |                  | Reference                      |                  |
| 30-49                                 | 0.32 (0.09 to 1.09)                                   | 0.07             | 0.27 (0.11 to 0.65)            | <b>&lt;0.001</b> | 0.75 (-0.13 to 1.62)                             | 0.10             | 0.70 (-0.03 to 1.43)           | 0.06             |
| 50-69                                 | 0.57 (0.13 to 2.41)                                   | 0.44             | 0.41 (0.17 to 0.98)            | <b>&lt;0.001</b> | 0.32 (-0.78 to 1.41)                             | 0.57             | 0.46 (-0.35 to 1.27)           | 0.26             |
| >70                                   | 0.40 (0.07 to 2.30)                                   | 0.30             | 0.30 (0.11 to 0.86)            | <b>0.02</b>      | 0 (-1.32 to 1.33)                                | 1.00             | 0.44 (-1.40 to 2.28)           | 0.64             |
| <b>Chronic illness<sup>f</sup></b>    |                                                       | 0.63             |                                | 0.70             |                                                  | 0.15             |                                | <b>&lt;0.001</b> |
| 0                                     | Reference                                             |                  | Reference                      |                  | Reference                                        |                  | Reference                      |                  |
| 1                                     | 0.81 (0.39 to 1.68)                                   | 0.57             | 1.11 (0.61 to 2.00)            | 0.74             | 0.33 (-0.02 to 0.68)                             | 0.07             | 0.37 (0.09 to 0.65)            | <b>0.01</b>      |
| 2+                                    | 1.28 (0.50 to 3.24)                                   | 0.60             | 1.33 (0.68 to 2.60)            | 0.40             | -0.07 (-0.82 to 0.68)                            | 0.85             | 0.76 (0.27 to 1.26)            | <b>&lt;0.001</b> |
| <b>Lowest IRSAD quintile</b>          | 0.34 (0.14 to 0.82)                                   | <b>0.02</b>      | 0.34 (0.17 to 0.66)            | <b>&lt;0.001</b> | -0.17 (-0.67 to 0.33)                            | 0.50             | 0.40 (0.07 to 0.72)            | <b>0.02</b>      |
| <b>University education</b>           | 1.87 (0.68 to 5.13)                                   | 0.23             | 0.50 (0.25 to 1.02)            | 0.06             | -0.12 (-0.53 to 0.29)                            | 0.57             | -0.02 (-0.36 to 0.32)          | 0.91             |
| <b>Adequate health literacy</b>       | 0.41 (0.21 to 0.81)                                   | <b>0.01</b>      | 0.80 (0.48 to 1.35)            | 0.41             | 0.08 (-0.38 to 0.53)                             | 0.75             | 0.22 (-0.08 to 0.53)           | 0.15             |
| <b>English-language proficiency</b>   | 1.46 (0.66 to 3.21)                                   | 0.35             | 1.02 (0.61 to 1.71)            | 0.95             | -0.31 (-0.64 to 0.02)                            | 0.06             | -0.11 (-0.41 to 0.19)          | 0.46             |
| <b>Years living in Australia</b>      |                                                       | 0.13             |                                | 0.53             |                                                  | 0.91             |                                | 0.99             |
| 5 years or less                       | Reference                                             |                  | Reference                      |                  | Reference                                        |                  | Reference                      |                  |
| 6 to 10 years                         | 1.14 (0.45 to 2.93)                                   | 0.78             | 1.78 (0.73 to 4.34)            | 0.21             | 0.04 (-0.64 to 0.71)                             | 0.91             | -0.09 (-0.57 to 0.39)          | 0.72             |
| More than 10 years                    | 0.47 (0.18 to 1.20)                                   | 0.12             | 1.01 (0.53 to 1.93)            | 0.98             | -0.07 (-0.46 to 0.32)                            | 0.73             | -0.03 (-0.41 to 0.36)          | 0.89             |
| Born in Australia                     | 0.41 (0.08 to 2.15)                                   | 0.29             | 1.06 (0.34 to 3.35)            | 0.92             | -0.34 (-1.4 to 0.72)                             | 0.52             | 0 (-0.59 to 0.59)              | 1.00             |
| <b>Language group<sup>g</sup></b>     |                                                       | <b>&lt;0.001</b> |                                | <b>&lt;0.001</b> |                                                  | <b>&lt;0.001</b> |                                | <b>&lt;0.001</b> |
| <b>Perceived public health threat</b> | 0.97 (0.85 to 1.10)                                   | 0.59             | 1.06 (0.99 to 1.15)            | 0.10             | -                                                | -                | -                              | -                |
| <b>Mean financial burden</b>          | 1.70 (1.14 to 2.54)                                   | <b>0.01</b>      | 1.88 (1.38 to 2.56)            | <b>&lt;0.001</b> | -                                                | -                | -                              | -                |
| <b>Feeling lonely / alone</b>         | 0.98 (0.40 to 2.40)                                   | 0.96             | 0.37 (0.21 to 0.64)            | <b>&lt;0.001</b> | -                                                | -                | -                              | -                |
| <b>Feeling nervous / stressed</b>     | 0.33 (0.14 to 0.77)                                   | <b>0.01</b>      | 0.29 (0.17 to 0.49)            | <b>&lt;0.001</b> | -                                                | -                | -                              | -                |

NB: All regression models also control for date of survey completion (binary variable, before/after 23 June when restrictions in Greater Sydney were imposed).

<sup>a</sup>Total number of participants that responded to the question regarding the impacts of COVID-19 on their relationship with their partner

<sup>b</sup>Total number of participants reporting having children

<sup>c</sup>Unadjusted analyses do not control for co-variables; statistics represent the regression of each predictor on social outcomes with no other co-variables included in the model.

<sup>d</sup>Adjusted analyses exploring factors associated with negative impacts on relationships control for all covariates listed in this table.

<sup>e</sup>Adjusted analyses exploring factors associated with negative impacts on children do not control for perceived public health threat, financial burden or psychological outcomes (lonely/alone; nervous/stressed).

<sup>f</sup>Health conditions assessed included respiratory disease, asthma, chronic obstructive pulmonary disease, high blood pressure, cancer, heart disease, stroke, diabetes, depression and anxiety

<sup>g</sup>Individual comparisons for language group not presented as there is no specific contrast that is pragmatically relevant. Khmer was selected as the reference language group as this subsample was of adequate size (n>50) and had the highest proportion of people reporting negative impacts on relationships.

**Supplementary Table 3. Multiple regression model of factors associated with financial burden (n=707)<sup>a</sup>**

|                                     | Unadjusted analysis <sup>b</sup> |                  | Adjusted analysis <sup>c</sup> |                  |
|-------------------------------------|----------------------------------|------------------|--------------------------------|------------------|
|                                     | B (95% CI)                       | P value          | B (95% CI)                     | P value          |
| <b>Gender</b>                       |                                  |                  |                                |                  |
| Male                                | Reference                        |                  | Reference                      |                  |
| Female                              | 0.03 (-0.15 to 0.21)             | 0.77             | 0.01 (-0.13 to 0.15)           | 0.89             |
| <b>Age group</b>                    |                                  | <b>&lt;0.001</b> |                                | <b>&lt;0.001</b> |
| 18-29                               | Reference                        |                  | Reference                      |                  |
| 30-49                               | 0.07 (-0.19 to 0.34)             | 0.58             | 0.08 (-0.15 to 0.32)           | 0.49             |
| 50-69                               | 0.09 (-0.20 to 0.38)             | 0.54             | 0.03 (-0.22 to 0.29)           | 0.80             |
| >70                                 | -0.40 (-0.67 to -0.12)           | <b>0.01</b>      | -0.51 (-0.82 to -0.20)         | <b>&lt;0.001</b> |
| <b>Comorbidity<sup>d</sup></b>      |                                  | 0.14             |                                | <b>&lt;0.001</b> |
| 0                                   | Reference                        |                  | Reference                      |                  |
| 1                                   | 0.21 (0 to 0.41)                 | <b>0.05</b>      | 0.26 (0.06 to 0.46)            | <b>0.01</b>      |
| 2+                                  | 0.07 (-0.12 to 0.26)             | 0.48             | 0.35 (0.15 to 0.54)            | <b>&lt;0.001</b> |
| <b>Lowest IRSAD quintile</b>        | -0.01 (-0.21 to 0.18)            | 0.91             | -0.06 (-0.22 to 0.11)          | 0.50             |
| <b>University education</b>         | -0.27 (-0.46 to -0.09)           | <b>&lt;0.001</b> | -0.18 (-0.36 to 0.01)          | 0.06             |
| <b>Adequate health literacy</b>     | 0.05 (-0.13 to 0.24)             | 0.56             | 0.14 (-0.06 to 0.33)           | 0.16             |
| <b>English-language proficiency</b> | -0.09 (-0.25 to 0.07)            | 0.27             | -0.12 (-0.32 to 0.08)          | 0.24             |
| <b>Years living in Australia</b>    |                                  | <b>0.01</b>      |                                | 0.24             |
| 5 years or less                     | Reference                        |                  | Reference                      |                  |
| 6 to 10 years                       | 0.14 (-0.11 to 0.38)             | 0.27             | 0.05 (-0.19 to 0.30)           | 0.67             |
| More than 10 years                  | -0.17 (-0.37 to 0.02)            | 0.07             | -0.12 (-0.32 to 0.09)          | 0.26             |
| Born in Australia                   | -0.33 (-0.77 to 0.11)            | 0.14             | -0.21 (-0.61 to 0.19)          | 0.31             |
| <b>Language group<sup>e</sup></b>   | -                                | <b>&lt;0.001</b> | -                              | <b>&lt;0.001</b> |

NB: All regression models also control for date of survey completion (binary variable, before/after 23 June when restrictions in Greater Sydney were imposed).

<sup>a</sup> n=1 respondent excluded from the weighted analyses presented in this table

<sup>b</sup> Unadjusted analyses do not control for co-variables; statistics represent the regression of each predictor on financial burden with no other co-variables included in the model.

<sup>c</sup> Adjusted analyses control for all covariates listed in this table.

<sup>d</sup> Health conditions assessed included respiratory disease, asthma, chronic obstructive pulmonary disease, high blood pressure, cancer, heart disease, stroke, diabetes, depression and anxiety

<sup>e</sup> Individual comparisons for language group not presented as there is no specific contrast that is pragmatically relevant. Khmer was selected as the reference language group as this subsample was of adequate size (n>50).
